# Supplementary material
Source: PubMed Central journal article supplement (PMC9106421)
Supplement: mmc1.pdf [file mmc1.pdf]

# THE LANCET

## Gastroenterology & Hepatology

### **Supplementary appendix**

This appendix formed part of the original submission. We post it as supplied by the authors.

Supplement to: P Brodin, M Arditi. Severe acute hepatitis in children: investigate SARS-CoV-2 superantigens. *Lancet Gastroenterol Hepatol* 2022; published online May 13. [https://doi.org/10.1016/S2468-1253\(22\)00166-2](https://doi.org/10.1016/S2468-1253(22)00166-2).

## SARS-CoV-2 infection

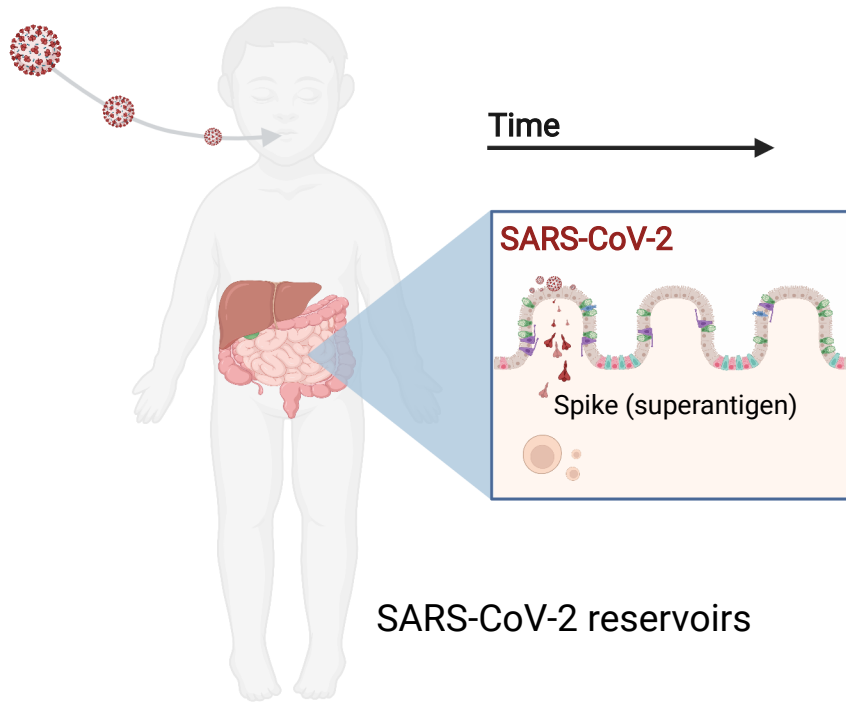

## Adenovirus infection

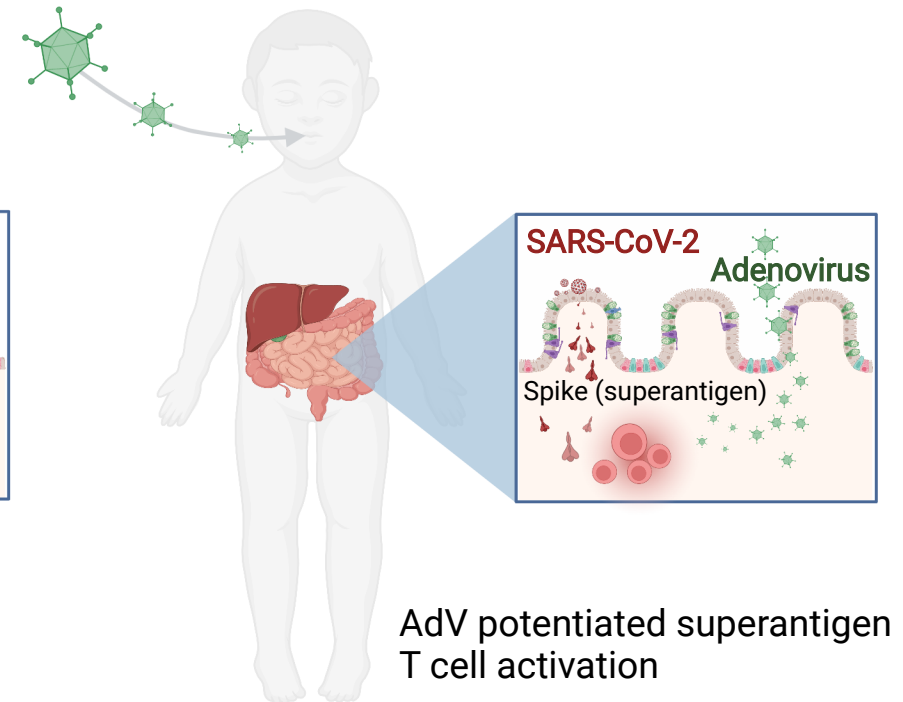

**Figure 1. Hypothesis of AdV potentiated SARS-CoV-2 superantigen-mediated pathology in severe, acute hepatitis.** Following infection with SARS-CoV-2 virus, viral reservoirs have been reported and could over time lead to repeated super-antigen mediated immune cell activation as shown in Multisystem inflammatory syndrome, MIS-C. If such viral reservoirs are present and a child is subsequently infected with AdV, this superantigen-mediated effect could be much more pronounced and potentially give rise to immunopathology such as the recently reported acute, severe hepatitis which is why evidence of such immunopathology should be investigated in these cases.
